# Supplementary material for: Essential healthcare services provided to conflict-affected internally displaced populations in low and middle-income countries: A systematic review
Source: PubMed Central journal article supplement (PMC7036202; doi:10.15171/hpp.2020.06), 2020-01-28
Supplement: hpp-10-24-s001.pdf [file hpp-10-24-s001.pdf]

## Supplementary file 1. Sample search strategy from EMBASE Database

| # ▲ | Searches                                                                                                                                                                                                                         | Results  | Type     |
|-----|----------------------------------------------------------------------------------------------------------------------------------------------------------------------------------------------------------------------------------|----------|----------|
| 1   | (Internally displaced* or displaced*).mp. [mp=title, abstract, heading word, drug trade name, original title, device manufacturer, drug manufacturer, device trade name, keyword, floating subheading word, candidate term word] | 37137    | Advanced |
| 2   | limit 1 to (human and yr="2000 -Current")                                                                                                                                                                                        | 16507    | Advanced |
| 3   | (conflict* or complex emergency*).mp. [mp=title, abstract, heading word, drug trade name, original title, device manufacturer, drug manufacturer, device trade name, keyword, floating subheading word, candidate term word]     | 165704   | Advanced |
| 4   | 1 and 2 and 3                                                                                                                                                                                                                    | 540      | Advanced |
| 5   | health*.mp. [mp=title, abstract, heading word, drug trade name, original title, device manufacturer, drug manufacturer, device trade name, keyword, floating subheading word, candidate term word]                               | 4836123  | Advanced |
| 6   | (water* or sanitation*).mp. [mp=title, abstract, heading word, drug trade name, original title, device manufacturer, drug manufacturer, device trade name, keyword, floating subheading word, candidate term word]               | 1104238  | Advanced |
| 7   | (nutrit* or food*).mp. [mp=title, abstract, heading word, drug trade name, original title, device manufacturer, drug manufacturer, device trade name, keyword, floating subheading word, candidate term word]                    | 1159647  | Advanced |
| 8   | (vaccin* or Immun*).mp. [mp=title, abstract, heading word, drug trade name, original title, device manufacturer, drug manufacturer, device trade name, keyword, floating subheading word, candidate term word]                   | 839762   | Advanced |
| 9   | prevent*.mp. [mp=title, abstract, heading word, drug trade name, original title, device manufacturer, drug manufacturer, device trade name, keyword, floating subheading word, candidate term word]                              | 2646083  | Advanced |
| 10  | educat*.mp. [mp=title, abstract, heading word, drug trade name, original title, device manufacturer, drug manufacturer, device trade name, keyword, floating subheading word, candidate term word]                               | 1245171  | Advanced |
| 11  | treat*.mp. [mp=title, abstract, heading word, drug trade name, original title, device manufacturer, drug manufacturer, device trade name, keyword, floating subheading word, candidate term word]                                | 7802736  | Advanced |
| 12  | (drug* or medic*).mp. [mp=title, abstract, heading word, drug trade name, original title, device manufacturer, drug manufacturer, device trade name, keyword, floating subheading word, candidate term word]                     | 13494116 | Advanced |
| 13  | 4 and 5                                                                                                                                                                                                                          | 369      | Advanced |
| 14  | 4 and 6                                                                                                                                                                                                                          | 30       | Advanced |
| 15  | 4 and 7                                                                                                                                                                                                                          | 72       | Advanced |
| 16  | 4 and 8                                                                                                                                                                                                                          | 35       | Advanced |
| 17  | 4 and 9                                                                                                                                                                                                                          | 101      | Advanced |
| 18  | 4 and 10                                                                                                                                                                                                                         | 70       | Advanced |
| 19  | 4 and 11                                                                                                                                                                                                                         | 139      | Advanced |
| 20  | 4 and 12                                                                                                                                                                                                                         | 169      | Advanced |
| 21  | 13 or 14 or 15 or 16 or 17 or 18 or 19 or 20                                                                                                                                                                                     | 468      | Advanced |
