# Supplementary material for: Essential healthcare services provided to conflict-affected internally displaced populations in low and middle-income countries: A systematic review
Source: PubMed Central journal article supplement (PMC7036202; doi:10.15171/hpp.2020.06), 2020-01-28
Supplement: hpp-10-24-s002.pdf [file hpp-10-24-s002.pdf]

## Supplementary File 2. Customized CASP Study Quality Checklist

|                                                                       |                      |                                                                |                      |
|-----------------------------------------------------------------------|----------------------|----------------------------------------------------------------|----------------------|
| <b>Study No</b>                                                       | <input type="text"/> | <b>Author Details</b>                                          | <input type="text"/> |
| <b>Study Title</b>                                                    | <input type="text"/> |                                                                |                      |
| <b>Study Design</b>                                                   | <input type="text"/> | <b>Is there a clear study result?</b>                          | <input type="text"/> |
| <b>Is there a clear research focus?</b>                               | <input type="text"/> | <b>Are ethical issues and limitations reported?</b>            | <input type="text"/> |
| <b>Is an appropriate methodology used?</b>                            | <input type="text"/> | <b>Are result applicable and replicable?</b>                   | <input type="text"/> |
| <b>Is appropriate recruitment done (with stats)?</b>                  | <input type="text"/> | <b>Does it fit with other related evidence?</b>                | <input type="text"/> |
| <b>Is there a comparison group?</b>                                   | <input type="text"/> | <b>What are the study implications and/or Recommendations?</b> | <input type="text"/> |
| <b>Is bias minimized with clear inclusion and exclusion criteria?</b> | <input type="text"/> | <b>Quality Summary Note</b>                                    | <input type="text"/> |
| <b>Are confounders accounted?</b>                                     | <input type="text"/> | <b>Quality Score</b>                                           | <input type="text"/> |
| <b>List of accounted confounders</b>                                  | <input type="text"/> | <b>Quality Grade</b>                                           | <input type="text"/> |
| <b>Are comparison groups similar?</b>                                 | <input type="text"/> |                                                                |                      |
| <b>Is follow up completion rate reported?</b>                         | <input type="text"/> |                                                                |                      |
| <b>Are loss to follow up reasons reported?</b>                        | <input type="text"/> |                                                                |                      |
